# Supplementary material for: Analysis of the nucleotide sequence of the guinea pig cytomegalovirus (GPCMV) genome
Source: PubMed Central journal article supplement (PMC2614972; doi:10.1186/1743-422x-5-139), 2008-11-12
Supplement: 1743-422X-5-139-S3.pdf [file 1743-422X-5-139-S3.pdf]

# gB

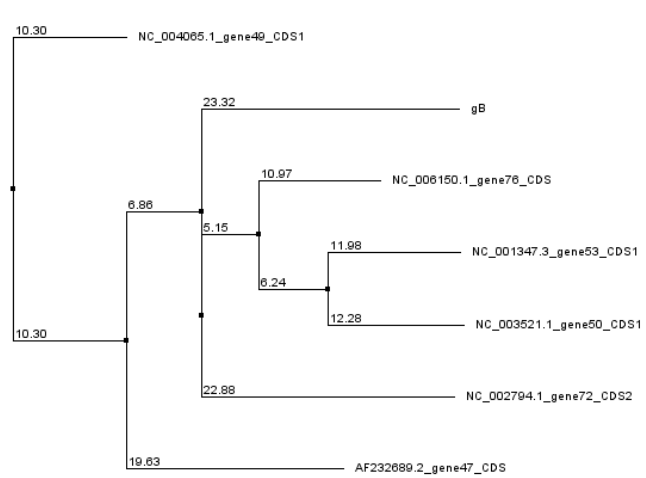

ClustalW

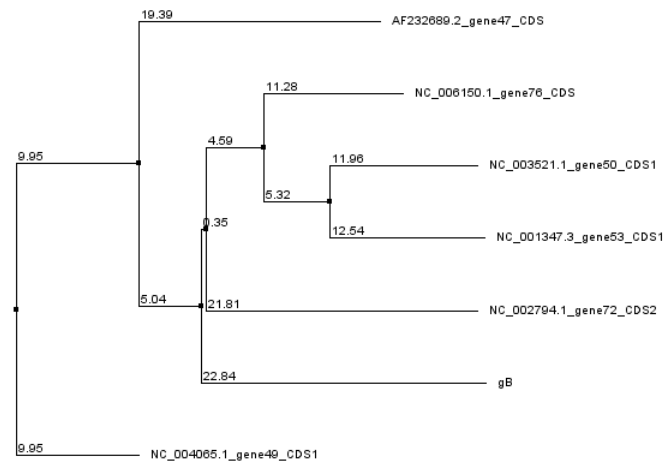

Muscle

# gH

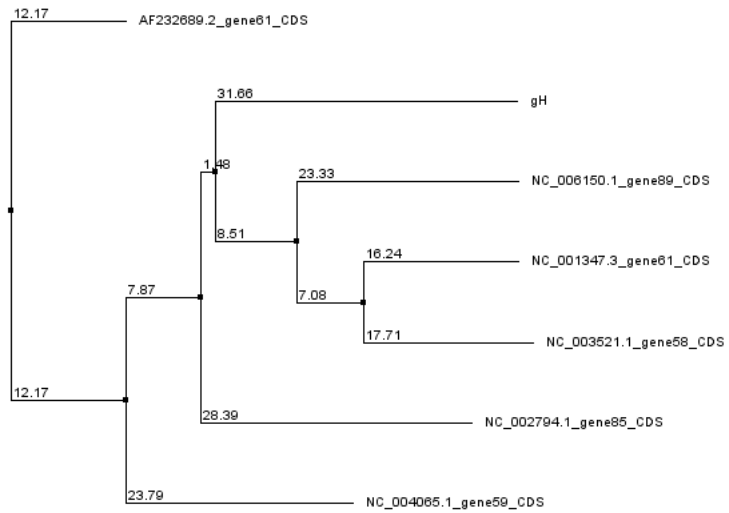

ClustalW

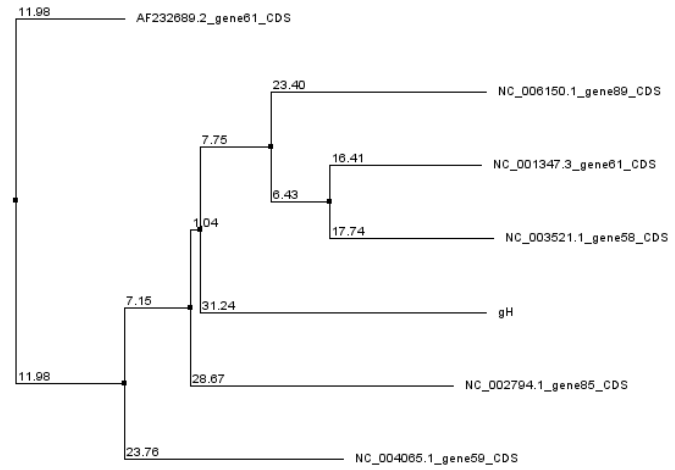

Muscle

gL

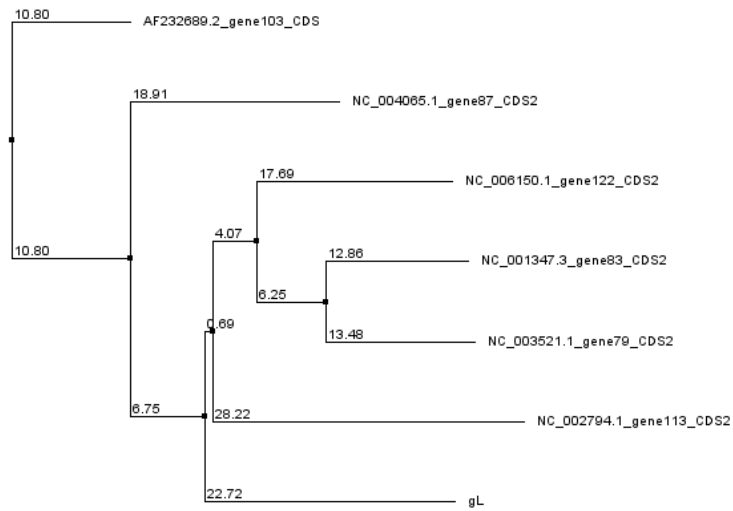

ClustalW

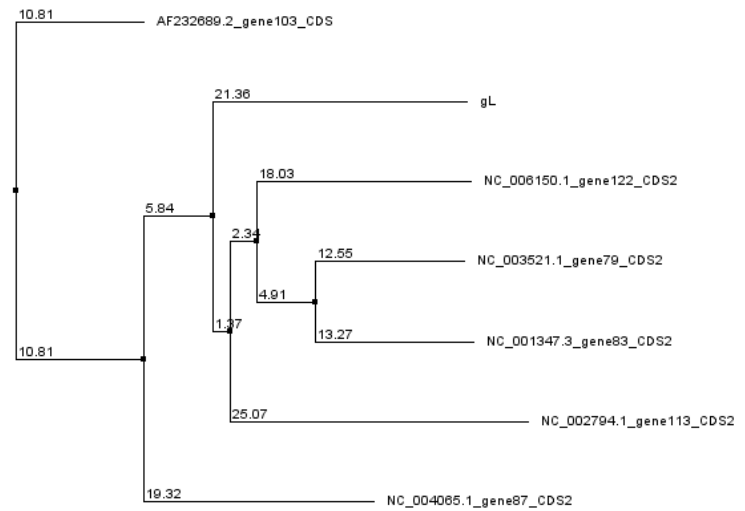

Muscle

# gN

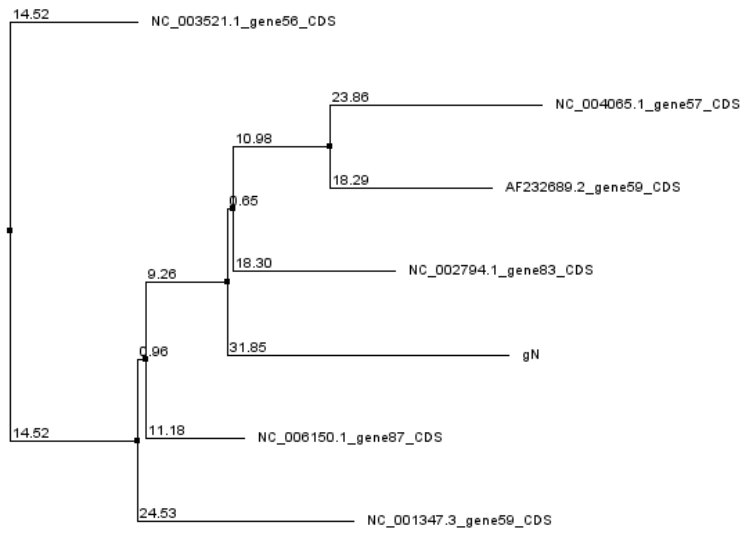

ClustalW

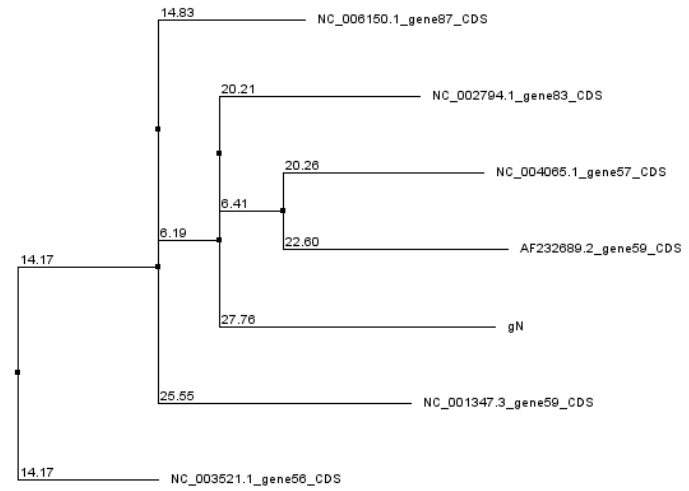

Muscle

gO

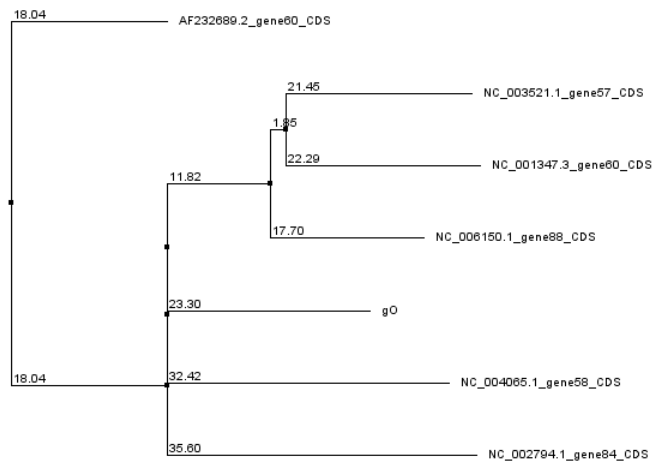

ClustalW

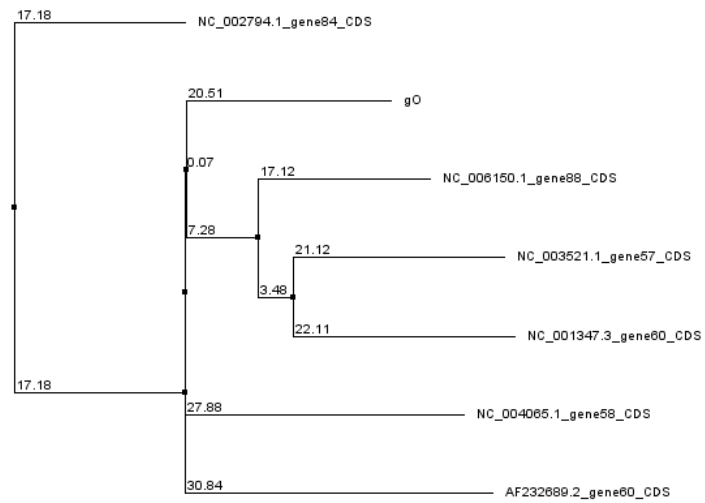

Muscle

# gp116

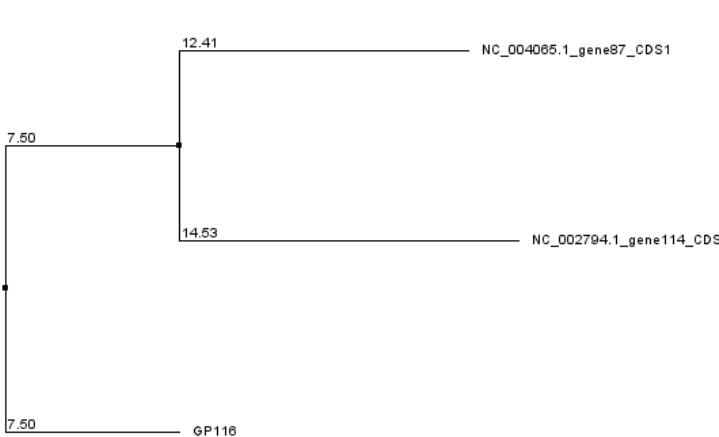

ClustalW

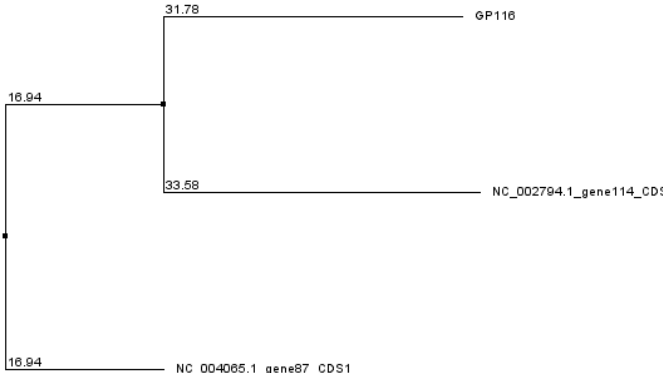

Muscle

# irs1

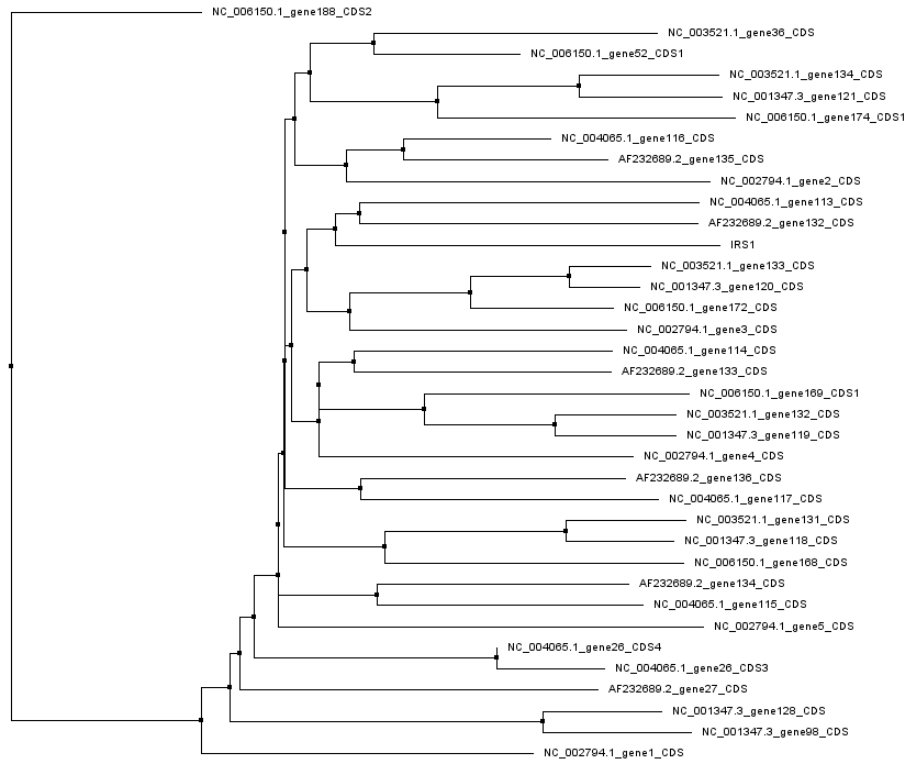

ClustalW

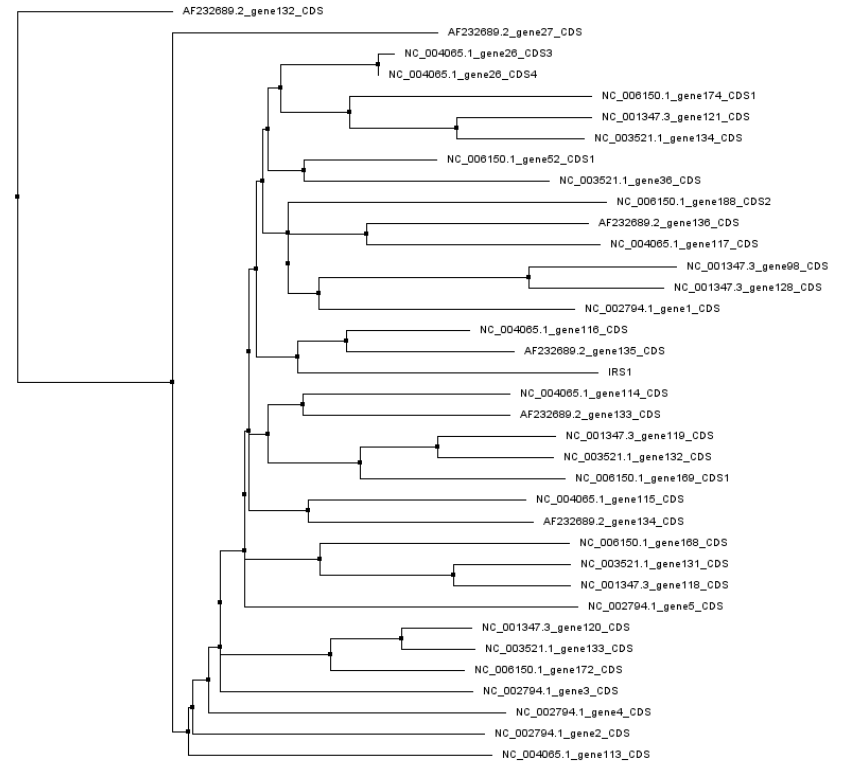

Muscle

# irs2

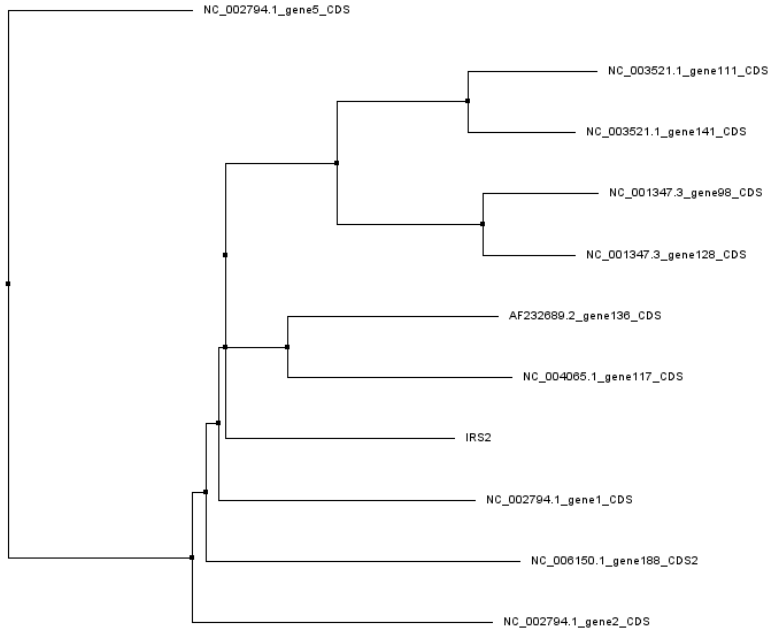

ClustalW

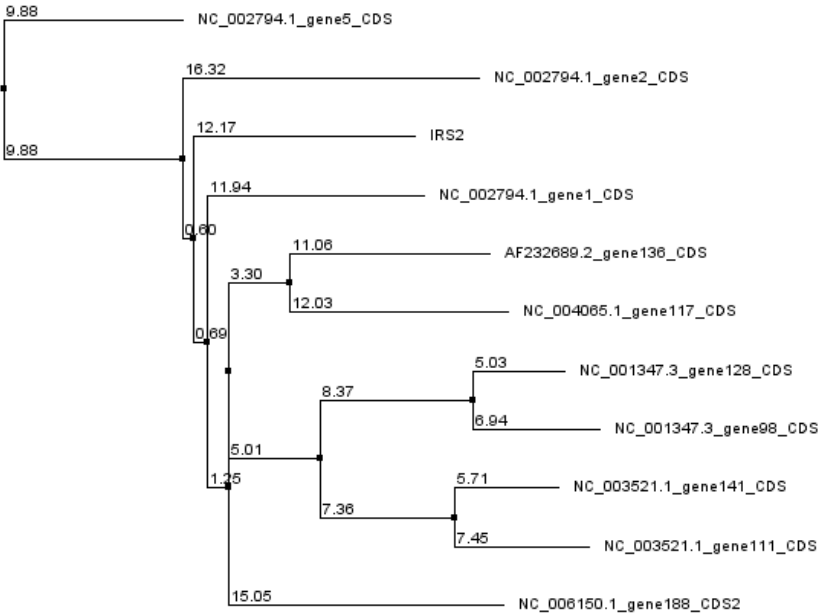

Muscle



# irs3

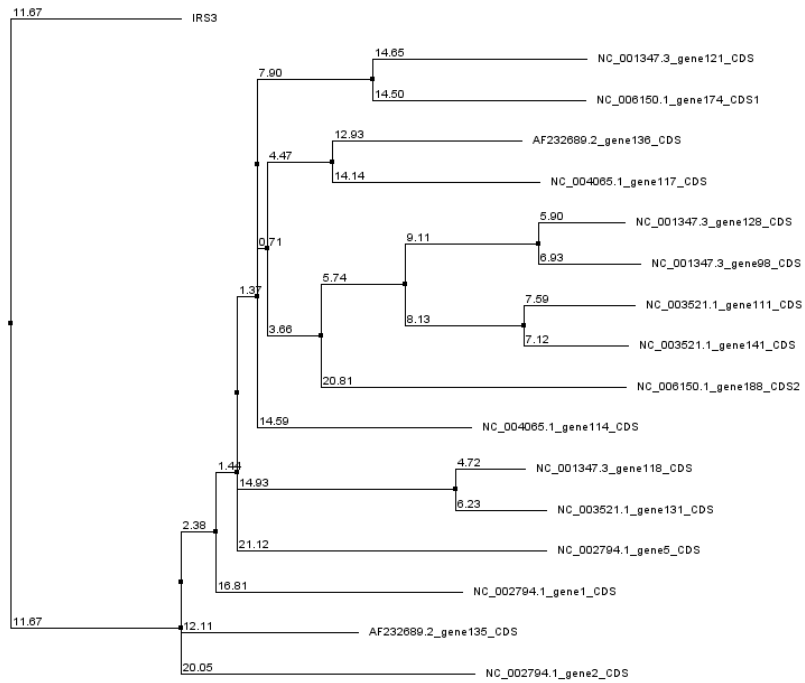

ClustalW

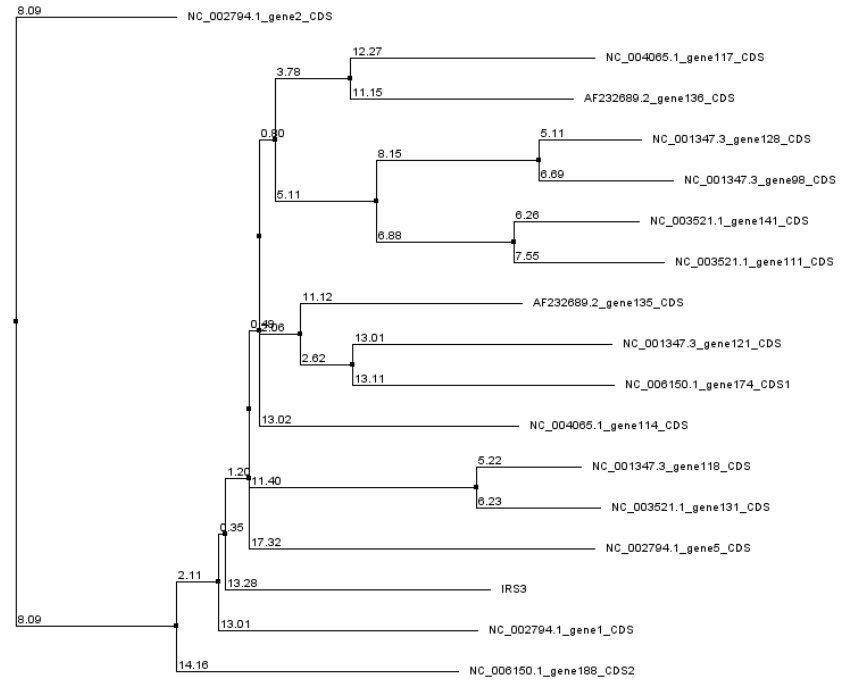

Muscle
